# Supplementary material for: Copper potentiates azole antifungal activity in a way that does not involve complex formation
Source: Royal Society of Chemistry journal article supplement (doi:10.1039/c9dt00642g), 2019-01-01
Supplement: c9dt00642g1.pdf [file c9dt00642g1.pdf]

**Electronic Supplementary Information (ESI)**

**Copper Potentiates Azole Antifungal Activity in a Way that Does Not Involve  
Complex Formation**

Elizabeth W. Hunsaker and Katherine J. Franz\*

*Department of Chemistry, Duke University  
French Family Science Center  
124 Science Drive  
27708, Durham, NC, USA.  
E-mail: [katherine.franz@duke.edu](mailto:katherine.franz@duke.edu); Tel: +1 919-660-1541*

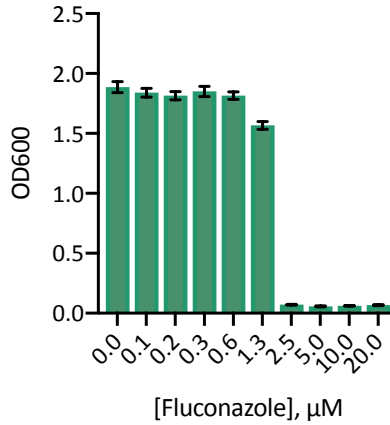

**Figure S1 | 24-h growth of cells treated with fluconazole.** The MIC of fluconazole at 24 h is 2.5  $\mu\text{M}$ .

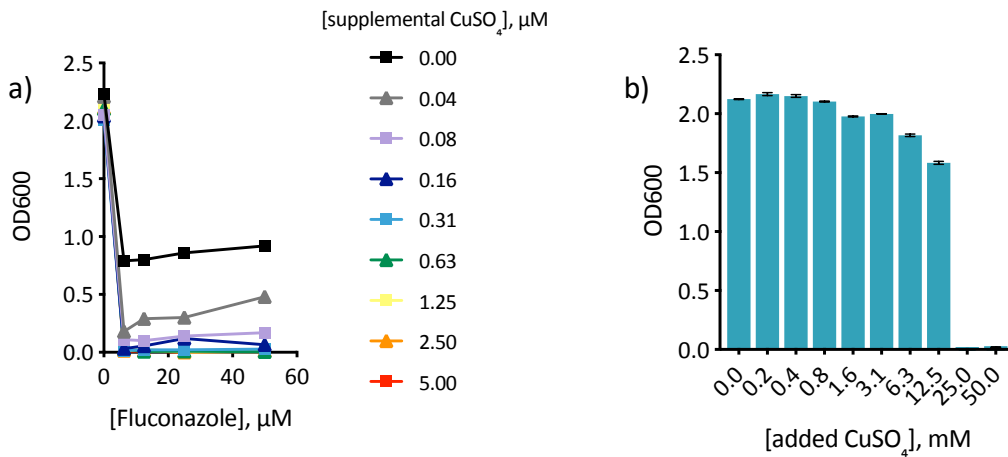

**Figure S2 | Fluconazole activity is potentiated with as little as 0.04  $\mu\text{M}$  supplemental Cu in YPD medium, several orders of magnitude below the MIC of Cu.** (a) A checkerboard assay was used to determine the minimal amount of Cu needed to inhibit growth of fluconazole-treated cells more than fluconazole alone. Addition of 0.04  $\mu\text{M}$  CuSO<sub>4</sub> supplemented into YPD was sufficient to observe improved 48 h growth inhibition by fluconazole. Total basal Cu of this batch of YPD was determined to be 0.168  $\mu\text{M} \pm 0.011$ . (b) The Cu tolerance of *C. albicans* in YPD was determined via a standard growth assay.

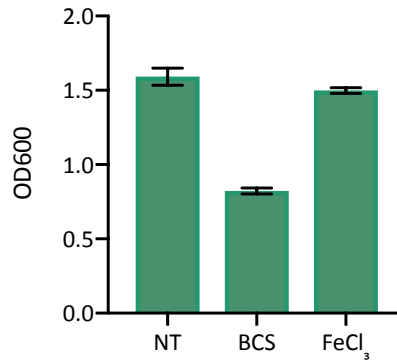

**Figure S3 | Growth of *C. albicans* in the presence of BCS or FeCl<sub>3</sub>.** Treatment with 500  $\mu\text{M}$  BCS slows cell growth, reducing it to ~50% of the untreated control at 48 h. Treatment with 250  $\mu\text{M}$  FeCl<sub>3</sub> does not impact 48 h growth.

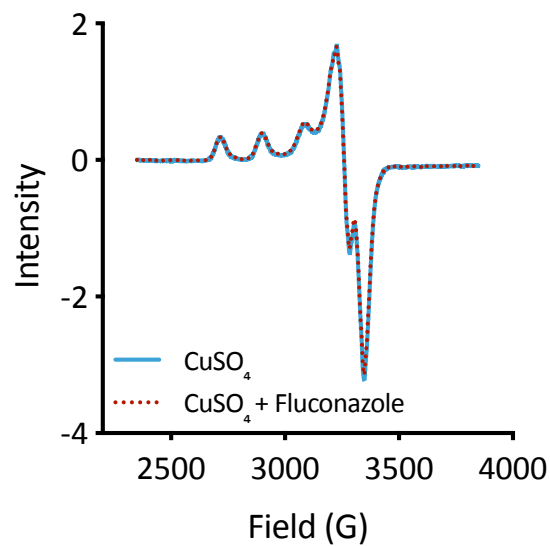

**Figure S4 | Fluconazole does not bind Cu(II) in YPD.** EPR spectra of fluconazole and Cu in YPD. Addition of Cu to YPD gives rise to an EPR spectrum (light blue trace) that is unchanged by addition of fluconazole (dotted red trace). Conditions: [FluC] = 300  $\mu$ M, [CuSO<sub>4</sub>] = 200  $\mu$ M in YPD with 20% glycerol. Data collected at 77 K.

**Table S1 | Metal Content ( $\mu$ M) of YPD Medium lot no. 2005064**

| Trial                              | Mg             | Ca                | Cu                   | Fe                | Mn                 | Zn                  | Co                   | Ni                   |
|------------------------------------|----------------|-------------------|----------------------|-------------------|--------------------|---------------------|----------------------|----------------------|
| 1                                  | 187            | 89.7              | 0.163                | 9.94              | 0.135              | 22.29               | 0.190                | 0.133                |
| 2                                  | 172            | 88.8              | 0.180                | 10.2              | 0.125              | 22.03               | 0.176                | 0.127                |
| 3                                  | 173            | 87.2              | 0.161                | 10.2              | 0.132              | 22.01               | 0.178                | 0.123                |
| <b>Average <math>\pm</math> SD</b> | 177 $\pm$<br>8 | 88.6 $\pm$<br>1.3 | 0.168 $\pm$<br>0.011 | 10.1 $\pm$<br>0.2 | 0.13 $\pm$<br>0.01 | 22.11 $\pm$<br>0.15 | 0.181 $\pm$<br>0.008 | 0.128 $\pm$<br>0.005 |
